# Supplementary material
Source: Research Square preprint supplement (doi:10.21203/rs.3.rs-9503145/v1)
Supplement: Supplementary file 1 [file b9539a8194fe8d0337434201.pdf]

## Supplemental Material

### Content of Supplemental Material

#### Supplemental Tables

- **Table S1** Definitions of CKM syndrome stages.
- **Table S2** Detailed missing data for covariates.
- **Table S3** Baseline characteristics of participants with CKM stages 0–3, stratified by CVD status.
- **Table S4** Association between HGI median and incident CVD in participants with CKM syndrome stages 0–3 (sensitivity analysis).

#### Supplemental Figures

- **Figure S1** Flowchart of study participant selection.
- **Figure S2** The optimal cut-off value of CumHGI.
- **Figure S3** ROC curves comparing the predictive performance of HbA1c, FPG, HGI, and CumHGI for incident CVD in participants with CKM stages 0–3.
- **Figure S4** Subgroup analysis of HGI median and CVD risk in participants with CKM stage 0–3 (sensitivity analysis).

**Table S1.** Definitions of CKM syndrome stages.

| <b>CKM syndrome stages</b>                 | <b>Definition</b>                                                                                                                                                                                                                                                                                                                                                                                                                                                                                                                                                                                                                                                                                                                                                                                                                                                                                                                         |
|--------------------------------------------|-------------------------------------------------------------------------------------------------------------------------------------------------------------------------------------------------------------------------------------------------------------------------------------------------------------------------------------------------------------------------------------------------------------------------------------------------------------------------------------------------------------------------------------------------------------------------------------------------------------------------------------------------------------------------------------------------------------------------------------------------------------------------------------------------------------------------------------------------------------------------------------------------------------------------------------------|
| Stage 0: No CKM risk factors               | <p>Individuals without overweight/obesity, abdominal obesity, metabolic risk factors (hypertension, hypertriglyceridemia, prediabetes, diabetes, MetS), CKD, or subclinical/clinical CVD.</p> <p>All criteria are met:</p> <ul style="list-style-type: none"><li>● BMI &lt; 23 kg/m<sup>2</sup></li><li>● Waist circumference &lt;80/90 cm in female/male</li><li>● SBP &lt; 130 mmHg, DBP &lt; 80 mmHg and without self-reported diagnosis of hypertension or use of anti-hypertensive medications</li><li>● TG &lt; 135 mg/dL</li><li>● Fasting blood glucose &lt; 100 mg/dL, HbA1c &lt; 5.7% and without self-reported diagnosis of diabetes, use of insulin, or oral hypoglycemic agents</li><li>● No MetS</li><li>● eGFR ≥ 60 ml/min/1.73m<sup>2</sup></li><li>● Predicted 10-year CVD risk based on the Framingham risk score (female &lt;21.5%, male &lt;21.6%)</li><li>● No clinical CVD</li></ul>                                |
| Stage 1: Excess or dysfunctional adiposity | <p>Individuals with overweight/obesity, abdominal obesity, or dysfunctional adipose tissue, without the presence of other metabolic risk factors or CKD.</p> <p>Any of the three criteria is met:</p> <ul style="list-style-type: none"><li>● Overweight/obesity</li><li>● Abdominal obesity</li><li>● Prediabetes</li></ul> <p>All criteria are met:</p> <ul style="list-style-type: none"><li>● SBP &lt;130 mmHg and DBP &lt;80 mmHg without self-reported diagnosis of hypertension or use of anti-hypertensive medications</li><li>● TG &lt; 135 mg/dL</li><li>● Fasting plasma glucose &lt; 126 mg/dL and HbA1c &lt; 6.5% and without self-reported diagnosis of diabetes, use of insulin, or oral hypoglycemic agents</li><li>● No MetS</li><li>● eGFR ≥ 60 ml/min/1.73m<sup>2</sup></li><li>● Predicted 10-year CVD risk based on the Framingham risk score (female &lt;21.5%, male &lt;21.6%)</li><li>● No clinical CVD</li></ul> |

---

Stage 2: Metabolic risk factors and CKD

Individuals with metabolic risk factors (hypertriglyceridemia, hypertension, diabetes, MetS), or CKD (moderate- or high-risk).

Any of the five criteria is met:

- Hypertriglyceridemia
- Hypertension
- Diabetes
- MetS
- Moderate-to-high-risk CKD

All criteria are met:

- No very high-risk CKD
- Predicted 10-year CVD risk based on the Framingham risk score (female < 21.5%, male < 21.6%)
- No clinical CVD

Stage 3: Subclinical CVD in CKM

Subclinical CVD among individuals with metabolic risk factors, or CKD.

Any of the two criteria is met:

- Very high-risk CKD
- Predicted 10-year CVD risk based on the Framingham risk score (female  $\geq$  21.5%, male  $\geq$  21.6%)

Any of the eight criteria is met:

- Overweight/obesity
- Abdominal obesity
- Prediabetes
- Hypertriglyceridemia
- Hypertension
- Diabetes
- MetS
- Moderate-to-high-risk CKD

The criterion is met:

- No clinical CVD
- 

Overweight/obesity was defined as BMI  $\geq$  23 kg/m<sup>2</sup>.

Abdominal obesity was defined as waist circumference (WC)  $\geq$  80 cm for women and  $\geq$  90 cm for men.

Hypertension was defined as systolic blood pressure (SBP)  $\geq$  130 mmHg or diastolic blood pressure (DBP)  $\geq$  80 mmHg or self-reported diagnosis of hypertension or use of antihypertensive medications.

Diabetes was defined as fasting plasma glucose (FPG)  $\geq$  126 mg/dL (7.0 mmol/L) or HbA1c  $\geq$  6.5% or self-reported diagnosis of diabetes or use of antidiabetic medications.

Prediabetes was defined as FPG  $\geq$  100–125 mg/dL or HbA1c between 5.7% and 6.4%.

Metabolic syndrome (MetS) is defined by the presence of 3 or more of the following:(1) abdominal obesity; (2) HDL-C  $<$  50 mg/dL for women and  $<$  40 mg/dL for men; (3) TG  $\geq$ 150 mg/dL; (4) elevated blood pressure (SBP  $\geq$ 130 mm Hg or DBP  $\geq$ 80 mm Hg and/or use of antihypertensive medications); and (5) FPG  $\geq$ 100 mg/dL.

Moderate-to-high-risk CKD is defined as eGFR  $\geq$  30 and  $<$  60 ml/min/1.73m<sup>2</sup>.

Very high-risk CKD is defined as eGFR  $<$  30 ml/min/1.73m<sup>2</sup>.

**Table S2.** Detailed missing data for covariates.

| <b>Variables</b> | <b>Missing data</b> |
|------------------|---------------------|
| Dyslipidemia     | 49 (1.3%)           |
| WBC              | 34 (0.9%)           |
| Hemoglobin       | 34 (0.9%)           |
| Platelets        | 33 (0.87%)          |
| SBP              | 12 (0.32%)          |
| DBP              | 12 (0.32%)          |
| LDL-C            | 6 (0.16%)           |
| Hypertension     | 3 (0.08%)           |
| Drinking Status  | 4 (0.11%)           |
| Diabetes         | 3 (0.08%)           |

Abbreviations: WBC, white blood cell count; SBP, systolic blood pressure; DBP, diastolic blood pressure; LDL-C, low-density lipoprotein cholesterol.

**Table S3.** Baseline characteristics of participants with CKM stages 0–3 according to CVD status.

| Variables                         | Total                   | Non-CVD                 | CVD                     | <i>P</i> value |
|-----------------------------------|-------------------------|-------------------------|-------------------------|----------------|
| <b>No. of participants</b>        | 3783                    | 2879                    | 904                     |                |
| <b>CKM syndrome stages, n (%)</b> |                         |                         |                         |                |
| Stage 0                           | 139 (3.7)               | 121 (4.2)               | 18 (2.0)                | <0.001         |
| Stage 1                           | 413 (10.9)              | 345 (12.0)              | 68 (7.5)                |                |
| Stage 2                           | 1087 (28.7)             | 810 (28.1)              | 277 (30.6)              |                |
| Stage 3                           | 2144 (56.7)             | 1603 (55.7)             | 541 (59.8)              |                |
| <b>Age, years</b>                 | 57.00 (51.00, 64.00)    | 57.00 (51.00, 63.00)    | 59.00 (54.00, 66.00)    | <0.001         |
| <b>Gender, n (%)</b>              |                         |                         |                         |                |
| Male                              | 1737 (45.9)             | 1367 (47.5)             | 370 (40.9)              | 0.001          |
| Female                            | 2046 (54.1)             | 1512 (52.5)             | 534 (59.1)              |                |
| <b>Marital status, n (%)</b>      |                         |                         |                         |                |
| Married                           | 3421 (90.4)             | 2630 (91.4)             | 791 (87.5)              |                |
| Other                             | 362 (9.6)               | 249 (8.6)               | 113 (12.5)              | 0.001          |
| <b>Education level, n (%)</b>     |                         |                         |                         |                |
| Elementary school and below       | 2545 (67.3)             | 1928 (67.0)             | 617 (68.3)              | 0.498          |
| Secondary school and above        | 1238 (32.7)             | 951 (33.0)              | 287 (31.7)              |                |
| <b>Residence, n (%)</b>           |                         |                         |                         |                |
| Rural                             | 2483 (65.6)             | 1935 (67.2)             | 548 (60.6)              | <0.001         |
| Urban                             | 1300 (34.4)             | 944 (32.8)              | 356 (39.4)              |                |
| <b>Smoking status, n (%)</b>      |                         |                         |                         |                |
| No                                | 2317 (61.2)             | 1756 (61.0)             | 561 (62.1)              | 0.593          |
| Yes                               | 1466 (38.8)             | 1123 (39.0)             | 343 (37.9)              |                |
| <b>Drinking status, n (%)</b>     |                         |                         |                         |                |
| No                                | 2320 (61.3)             | 1752 (60.9)             | 568 (62.8)              | 0.305          |
| Yes                               | 1463 (38.7)             | 1127 (39.1)             | 336 (37.2)              |                |
| <b>BMI, kg/m<sup>2</sup></b>      | 23.32 (21.09, 25.92)    | 23.13 (20.97, 25.59)    | 24.16 (21.62, 26.86)    | <0.001         |
| <b>Waist circumference, cm</b>    | 85.00 (78.00, 92.20)    | 84.20 (77.70, 91.00)    | 88.00 (80.00, 96.00)    | <0.001         |
| <b>SBP, mmHg</b>                  | 126.00 (113.50, 140.75) | 124.50 (112.50, 139.00) | 131.75 (117.88, 146.50) | <0.001         |
| <b>DBP, mmHg</b>                  | 74.00 (66.50, 82.50)    | 73.50 (66.50, 81.50)    | 76.00 (68.50, 85.00)    | <0.001         |
| <b>FPG, mg/dL</b>                 | 102.96 (95.22, 112.68)  | 102.60 (95.04, 112.14)  | 103.95 (95.58, 114.88)  | 0.002          |
| <b>HbA1c, %</b>                   | 5.10 (4.90, 5.40)       | 5.10 (4.90, 5.40)       | 5.20 (4.90, 5.50)       | <0.001         |
| <b>TC, mg/dL</b>                  | 191.75 (168.56, 216.50) | 190.59 (167.40, 216.11) | 195.23 (172.42, 219.59) | 0.002          |
| <b>TG, mg/dL</b>                  | 106.20 (75.22, 155.76)  | 103.54 (72.57, 152.22)  | 113.28 (82.97, 164.61)  | <0.001         |
| <b>HDL-C, mg/dL</b>               | 49.48 (40.59, 59.92)    | 49.87 (40.98, 60.70)    | 47.94 (39.43, 57.22)    | <0.001         |
| <b>LDL-C, mg/dL</b>               | 116.37 (95.10, 139.76)  | 115.59 (95.10, 138.98)  | 118.88 (97.42, 141.59)  | 0.013          |
| <b>Scr,mg/dL</b>                  | 0.75 (0.64, 0.87)       | 0.75 (0.64, 0.87)       | 0.73 (0.64, 0.87)       | 0.806          |
| <b>WBC, ×10<sup>9</sup>/L</b>     | 5.90 (4.92, 7.20)       | 5.90 (4.90, 7.10)       | 6.04 (5.10, 7.40)       | 0.003          |
| <b>PLT, ×10<sup>9</sup>/L</b>     | 209.00 (164.00, 257.00) | 207.00 (162.00, 254.00) | 216.00 (170.00, 266.00) | 0.001          |
| <b>BUN, mg/dl</b>                 | 15.07 (12.60, 17.98)    | 15.15 (12.65, 18.16)    | 14.80 (12.46, 17.67)    | 0.014          |
| <b>UA, mg/dl</b>                  | 4.21 (3.51, 5.04)       | 4.21 (3.51, 5.04)       | 4.21 (3.51, 5.06)       | 0.815          |
| <b>CRP, mg/dl</b>                 | 1.00 (0.53, 2.02)       | 0.94 (0.51, 1.88)       | 1.17 (0.61, 2.37)       | <0.001         |
| <b>Hemoglobin, g/dL</b>           | 14.40 (13.10, 15.60)    | 14.30 (13.10, 15.60)    | 14.40 (13.30, 15.80)    | 0.089          |

|                                       |                       |                       |                       |        |
|---------------------------------------|-----------------------|-----------------------|-----------------------|--------|
| <b>eGFR, ml/min/1.73m<sup>2</sup></b> | 95.57 (85.50, 103.14) | 96.31 (86.17, 103.70) | 93.58 (83.37, 100.96) | <0.001 |
| <b>Hypertension, n (%)</b>            |                       |                       |                       |        |
| No                                    | 2358 (62.3)           | 1914 (66.5)           | 444 (49.1)            | <0.001 |
| Yes                                   | 1425 (37.7)           | 965 (33.5)            | 460 (50.9)            |        |
| <b>Dyslipidaemia, n (%)</b>           |                       |                       |                       |        |
| No                                    | 3468 (91.7)           | 2700 (93.8)           | 768 (85.0)            | <0.001 |
| Yes                                   | 315 (8.3)             | 179 (6.2)             | 136 (15.0)            |        |
| <b>Diabetes, n (%)</b>                |                       |                       |                       |        |
| No                                    | 3566 (94.3)           | 2737 (95.1)           | 829 (91.7)            | <0.001 |
| Yes                                   | 217 (5.7)             | 142 (4.9)             | 75 (8.3)              |        |
| <b>HGI<sub>2011</sub>, %</b>          | -0.06 (-0.33, 0.23)   | -0.06 (-0.33, 0.22)   | -0.04 (-0.29, 0.24)   | 0.043  |
| <b>Follow-up time, months</b>         | 79.57 (13.80)         | 83.88 (0.99)          | 65.86 (23.38)         | <0.001 |

Abbreviations: CVD, cardiovascular disease; CKM, cardiovascular-kidney-metabolic; BMI, body mass index; SBP, systolic blood pressure; DBP, diastolic blood pressure; FPG, fasting plasma glucose; HbA1c, glycosylated hemoglobin; TC, total cholesterol; LDL-C, low-density lipoprotein cholesterol; HDL-C, high-density lipoprotein cholesterol; TG, triglycerides; Scr, serum creatinine; eGFR, estimated glomerular filtration rate; WBC, white blood cell count; BUN, blood urea nitrogen; UA, uric acid; CRP, C-reactive protein; HGI, hemoglobin glycation index; SD, standard deviation.

**Table S4.** Association between HGI median and incident CVD in participants with CKM syndrome stages 0–3 (sensitivity analysis).

|                         | Event/total, n (%) | Model 1          |              | Model 2          |              | Model 3          |             |
|-------------------------|--------------------|------------------|--------------|------------------|--------------|------------------|-------------|
|                         |                    | HR (95% CI)      | <i>P</i>     | HR (95% CI)      | <i>P</i>     | HR (95% CI)      | <i>P</i>    |
| <b>HGI median group</b> |                    |                  |              |                  |              |                  |             |
| Low (< -0.057)          | 437/1891 (23.1%)   | Ref              |              | Ref              |              | Ref              |             |
| High ( $\geq$ -0.057)   | 467/1892 (24.7%)   | 1.17 (1.02-1.33) | <b>0.021</b> | 1.16 (1.02-1.32) | <b>0.029</b> | 1.15 (1.01-1.31) | <b>0.04</b> |

Model 1: non-adjusted. Model 2: adjusted for age, gender, marital status, education level, and residence. Model 3: adjusted for age, gender, marital status, education level, residence, hypertension, dyslipidaemia, diabetes, and BMI. Abbreviations: HR, hazard ratio; CI, confidence interval; HGI, hemoglobin glycation index; CVD, cardiovascular disease; BMI, body mass index.

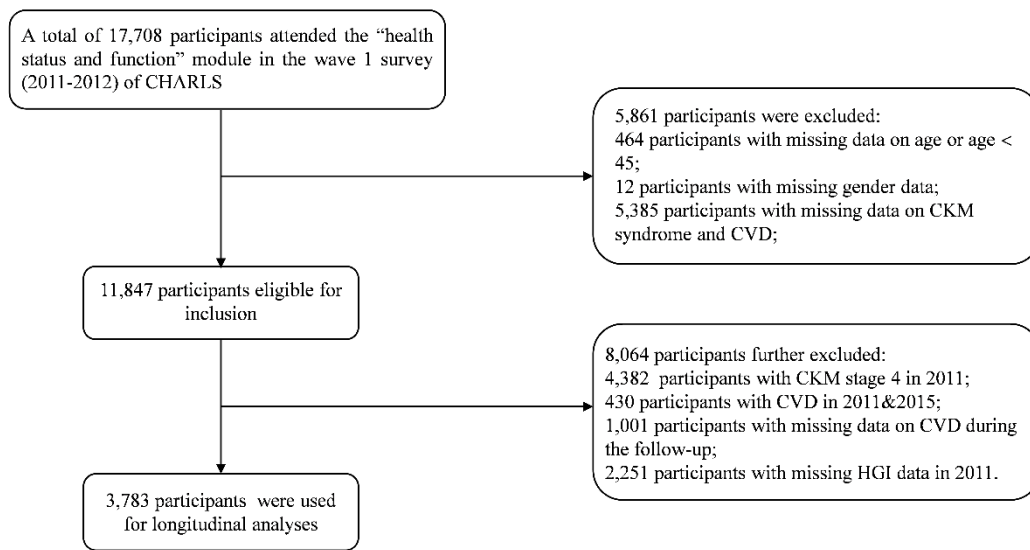

**Figure S1.** Flowchart of study participant selection.

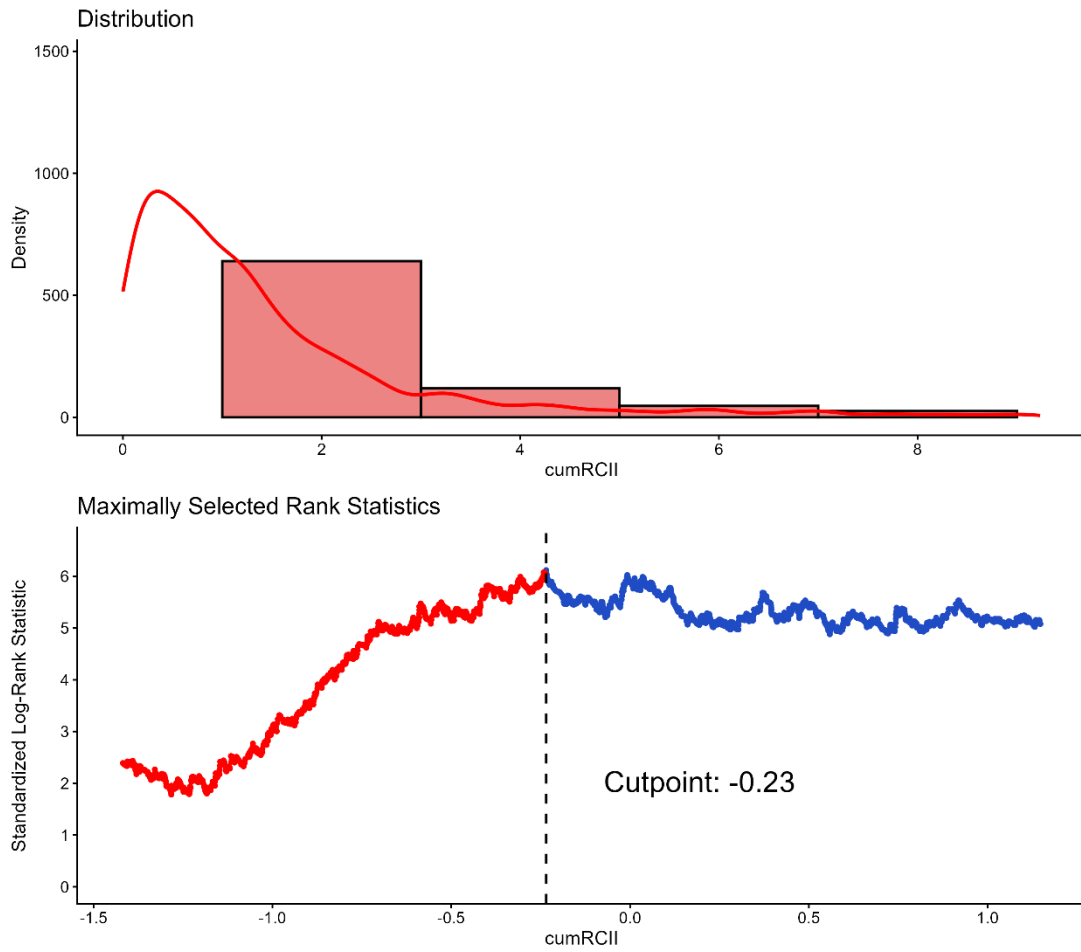

**Figure S2.** The optimal cut-off value of CumHGI. Abbreviations: CumHGI, cumulative hemoglobin glycation index.

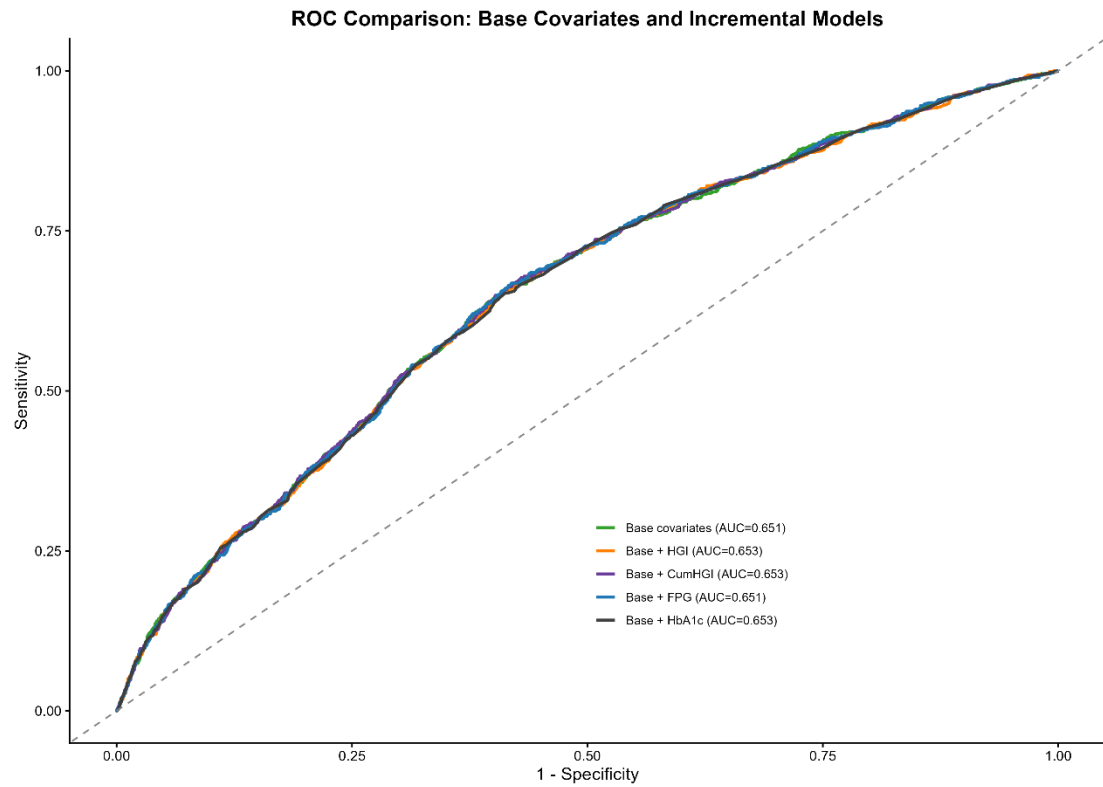

**Figure S3.** ROC curves comparing the predictive performance of HbA1c, FPG, HGI, and CumHGI for incident CVD in participants with CKM stages 0–3. Abbreviations: ROC, receiver operating characteristic; HbA1c, hemoglobin A1c; FPG, fasting plasma glucose; HGI, hemoglobin glycation index; CumHGI, cumulative hemoglobin glycation index; CVD, cardiovascular disease; CKM, cardiovascular-kidney-metabolic.

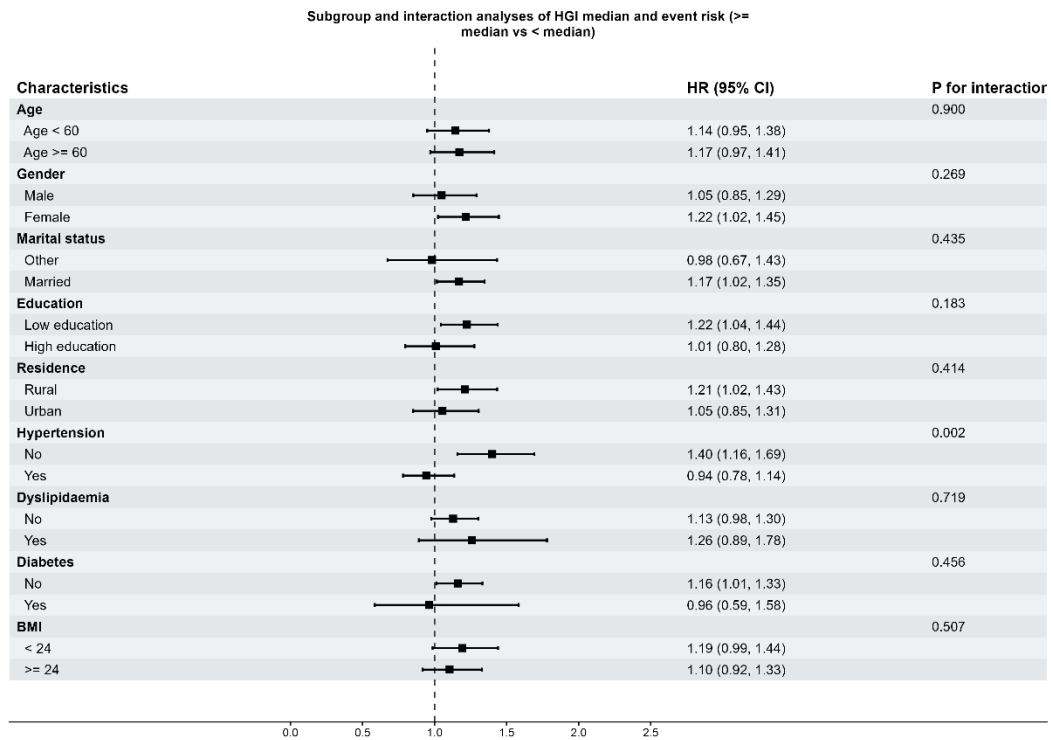

**Figure S4.** Subgroup analysis of HGI median and CVD risk in participants with CKM stage 0–3 (sensitivity analysis). All models were adjusted for age, gender, marital status, education level, residence, hypertension, dyslipidemia, diabetes, and BMI. Abbreviations: HR, hazard ratio; CI, confidence interval; HGI, hemoglobin glycation index; BMI, body mass index; CKM, cardiovascular-kidney-metabolic.
